# Supplementary material for: Vet-OncoNet: Malignancy Analysis of Neoplasms in Dogs and Cats
Source: MDPI journal article supplement (doi:10.3390/vetsci9100535), 2022-09-28
Supplement: s1 [file s1]

## Supplementary Material

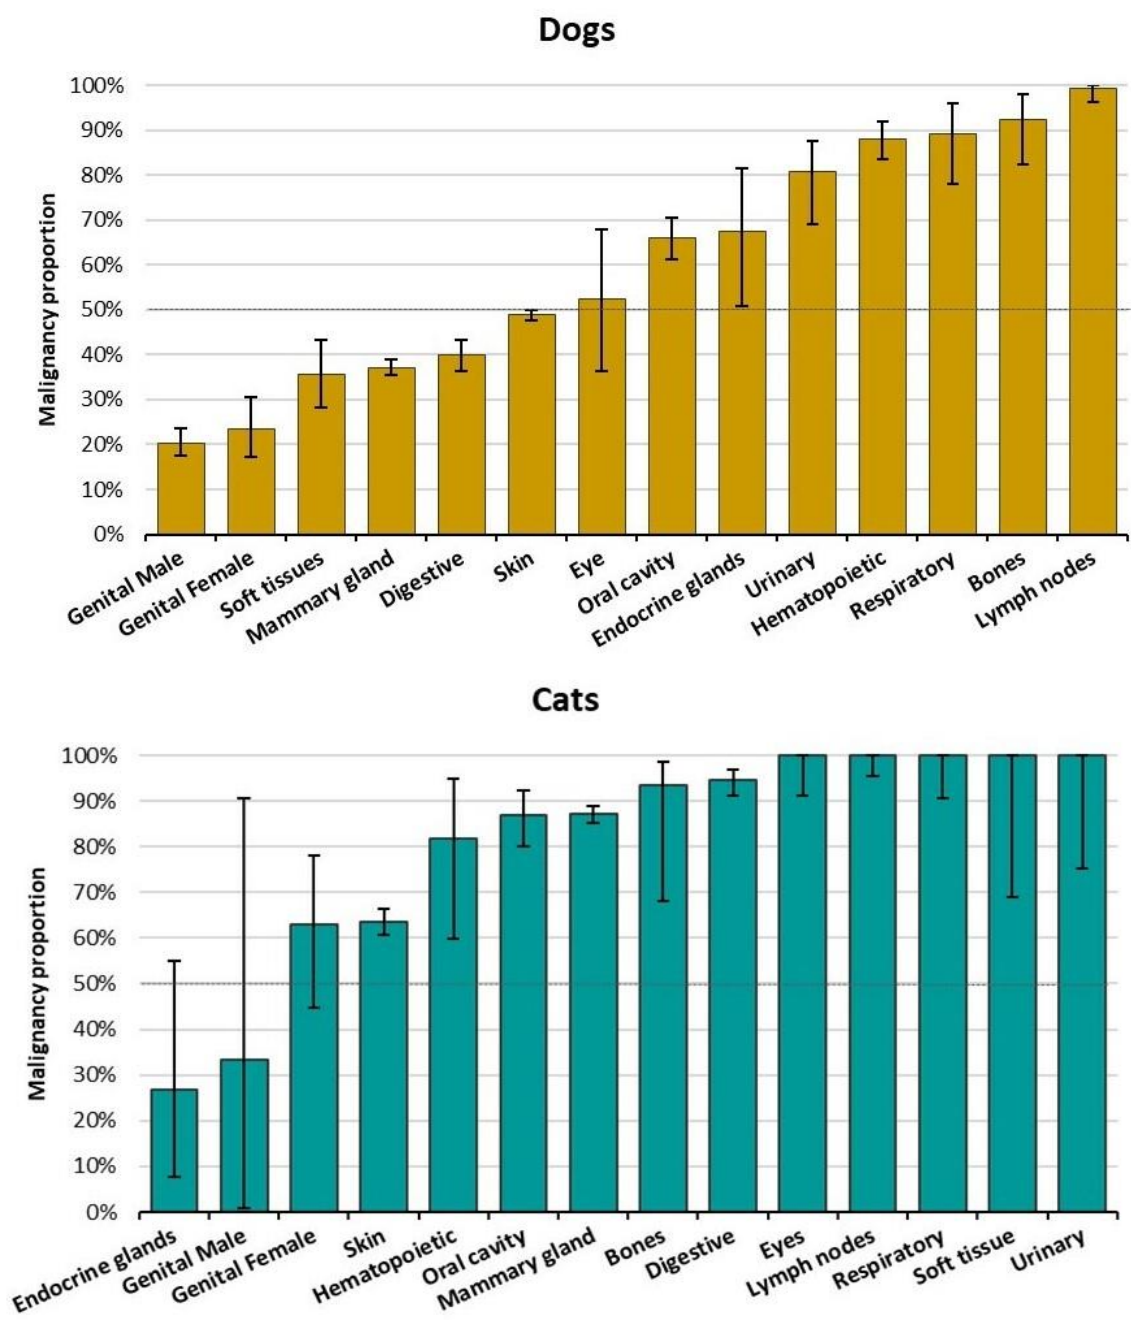

**Figure S1.** Malignancy proportion per topography group for dogs (top) and cats (down). Bars indicate 95% CI. Dashed line represents 50% of malignant tumours.

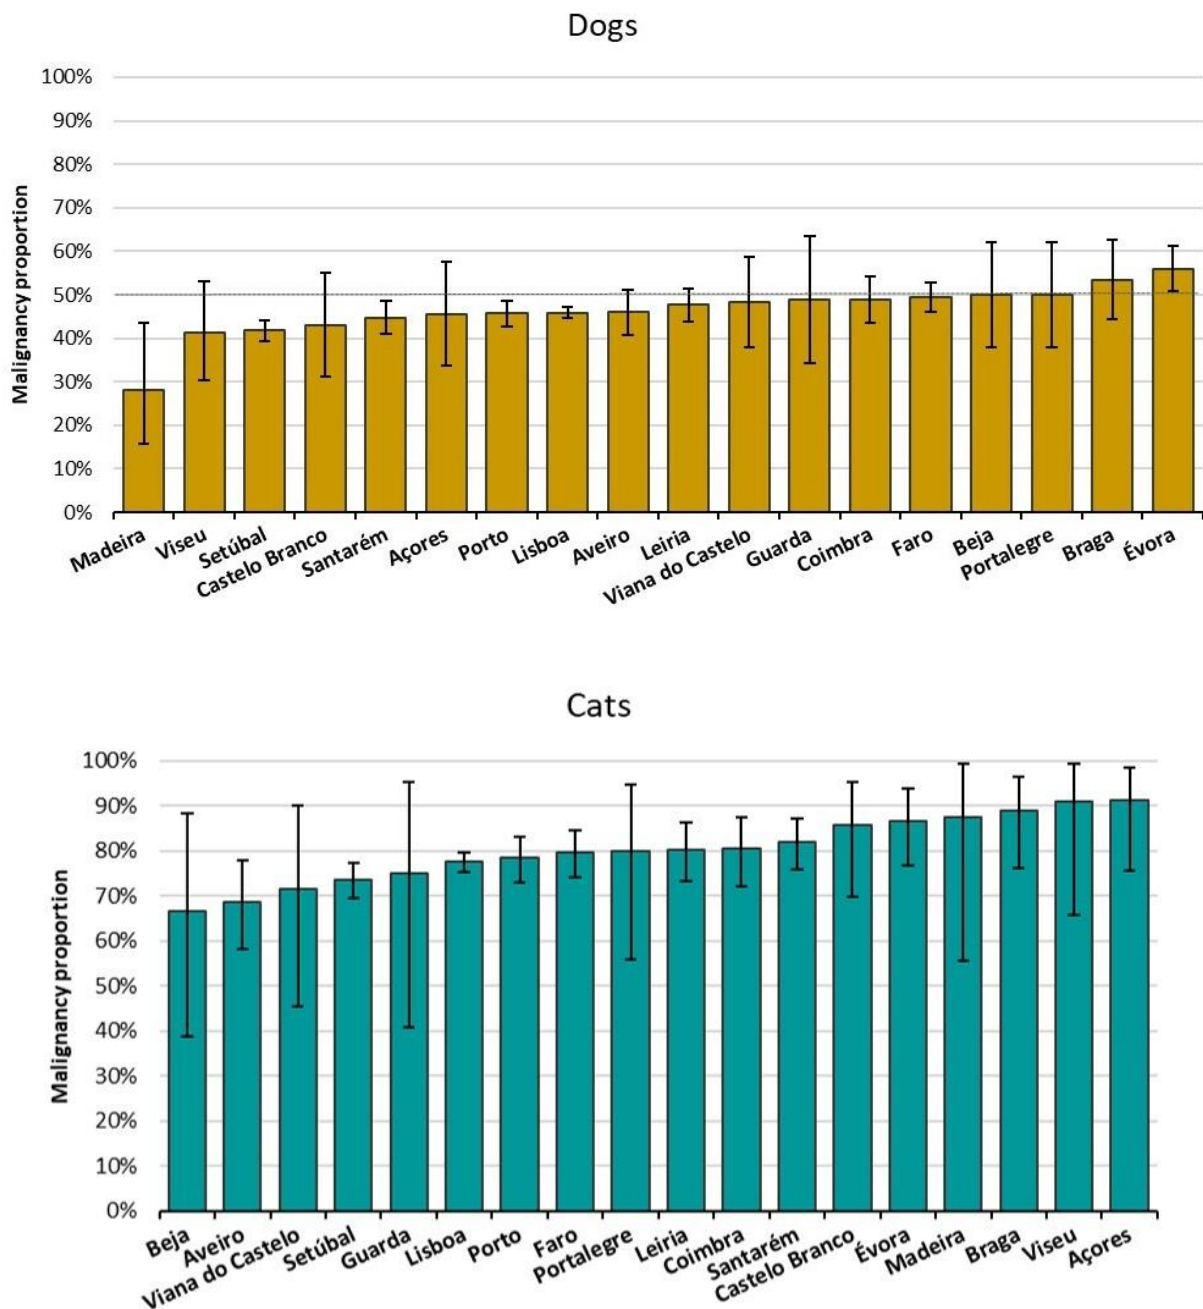

**Figure S2.** Malignancy proportion per districts from dogs (top) and cats (down). Bars indicate 95% CI. Dashed line depicts 50% of malignant tumours.

**Table S1.** List of morphologies classified as pre-neoplastic or tumour-like lesions, and not included in the analysis of malignancy.

| Morphologies                   |
|--------------------------------|
| Acanthomatous epulid           |
| Acrochordon                    |
| Actinic keratosis              |
| Adenomatous polyp              |
| Chemodectoma                   |
| Dermoid cyst                   |
| Fibropapilloma                 |
| Hamartoma                      |
| Odontogenic fibroma            |
| Ossifying epulis               |
| Papillomatosis                 |
| Peripheral odontogenic fibroma |
| Rectal polyp                   |

**Table S2.** Description of tumours from dogs according to topography groups (N, %) and proportion of malignant tumours (MP % and respective 95% Confidence Interval). Total of 13,006 records.

| Topography Groups | N      | %     | MP % | 95%CI       |
|-------------------|--------|-------|------|-------------|
| Skin              | 6421   | 49.5  | 48.8 | 0.475–0.500 |
| Mammary gland     | 3200   | 24.5  | 37.1 | 0.354–0.389 |
| Digestive         | 844    | 6.5   | 39.9 | 0.364–0.434 |
| Genital Male      | 817    | 6.3   | 20.4 | 0.175–0.234 |
| Oral cavity       | 458    | 3.5   | 66.1 | 0.613–0.706 |
| Hematopoietic     | 278    | 2.1   | 88.0 | 0.835–0.917 |
| Genital Female    | 193    | 1.5   | 23.5 | 0.173–0.306 |
| Lymph nodes       | 181    | 1.4   | 99.4 | 0.966–1.000 |
| Soft tissues      | 170    | 1.3   | 35.7 | 0.286–0.437 |
| Unknown site      | 159    | 1.2   | 69.3 | 0.613–0.764 |
| Bones and joints  | 67     | 0.5   | 93.0 | 0.829–0.980 |
| Urinary           | 66     | 0.5   | 80.9 | 0.691–0.897 |
| Respiratory       | 61     | 0.5   | 89.3 | 0.781–0.960 |
| Endocrine glands  | 47     | 0.4   | 67.5 | 0.509–0.814 |
| Eye               | 44     | 0.3   | 52.4 | 0.365–0.680 |
| Total             | 13,006 | 100.0 | 46.2 | 0.453–0.470 |

**Table S3.** Description of tumours from cats according to topography groups (N, %) and proportion of malignant tumours (MP % and respective 95% Confidence Interval). Total of 3266 records.

| Topography Groups | N    | %     | MP %  | 95%CI       |
|-------------------|------|-------|-------|-------------|
| Mammary gland     | 1270 | 38.9  | 87.0  | 0.852–0.889 |
| Skin              | 1266 | 38.8  | 63.6  | 0.608–0.663 |
| Digestive         | 266  | 8.1   | 94.5  | 0.913–0.968 |
| Oral cavity       | 135  | 4.1   | 87.1  | 0.801–0.923 |
| Lymph nodes       | 81   | 2.5   | 100.0 | 0.954–1.000 |
| Unknown site      | 53   | 1.6   | 90.2  | 0.785–0.967 |
| Eye               | 40   | 1.2   | 100.0 | 0.911–1.000 |
| Genital Female    | 38   | 1.2   | 63.1  | 0.459–0.781 |
| Respiratory       | 37   | 1.1   | 100.0 | 0.905–1.000 |
| Hematopoietic     | 22   | 0.7   | 81.8  | 0.597–0.948 |
| Bones and joints  | 15   | 0.5   | 93.3  | 0.680–0.998 |
| Endocrine glands  | 15   | 0.4   | 26.7  | 0.078–0.551 |
| Urinary           | 13   | 0.4   | 100.0 | 0.753–1.000 |
| Soft tissues      | 12   | 0.4   | 100.0 | 0.615–1.000 |
| Genital Male      | 3    | 0.1   | 33.3  | 0.008–0.906 |
| Total             | 3266 | 100.0 | 78.7  | 0.773–0.801 |

**Table S4.** Description of tumours from **dogs** according to breeds (N, %) and proportion of malignant tumours (MP % and respective 95% Confidence Interval). Total of 12,805 records.

| Breeds               | N    | %    | MP % | 95%CI       |
|----------------------|------|------|------|-------------|
| No breed             | 4850 | 37.8 | 46.6 | 0.451–0.480 |
| Labrador Retriever   | 1445 | 11.3 | 54.5 | 0.512–0.570 |
| Yorkshire Terrier    | 669  | 5.2  | 28.1 | 0.248–0.316 |
| German Shepherd      | 500  | 3.9  | 45.3 | 0.409–0.496 |
| French Bulldog       | 444  | 3.5  | 41.2 | 0.367–0.458 |
| Boxer                | 430  | 3.7  | 56.5 | 0.518–0.611 |
| Golden Retriever     | 433  | 3.4  | 51.3 | 0.466–0.560 |
| Poodle               | 400  | 3.1  | 36.5 | 0.318–0.412 |
| Cocker Spaniel       | 293  | 2.3  | 34.1 | 0.288–0.396 |
| Pit Bull             | 214  | 1.7  | 70.9 | 0.645–0.767 |
| Beagle               | 210  | 1.6  | 36.7 | 0.303–0.433 |
| Pinscher             | 198  | 1.5  | 34.3 | 0.279–0.411 |
| Jack Russell Terrier | 132  | 1.0  | 34.1 | 0.263–0.424 |
| Shih-Tzu             | 112  | 0.9  | 22.2 | 0.152–0.306 |
| Podengo              | 102  | 0.8  | 48.0 | 0.384–0.577 |
| Teckel               | 98   | 0.8  | 45.9 | 0.362–0.557 |
| Serra da Estrela     | 96   | 0.7  | 42.7 | 0.331–0.527 |
| Epagneul Breton      | 90   | 0.7  | 56.1 | 0.458–0.662 |
| Basset Hound         | 87   | 0.7  | 34.5 | 0.250–0.448 |
| Shar-Pei             | 79   | 0.6  | 55.7 | 0.447–0.663 |
| Siberian Husky       | 80   | 0.6  | 50.0 | 0.377–0.608 |
| Bull Terrier         | 78   | 0.6  | 48.7 | 0.378–0.597 |
| Rafeiro Alentejano   | 77   | 0.6  | 58.4 | 0.472–0.690 |
| Pekinese             | 75   | 0.6  | 40.0 | 0.294–0.512 |
| Chihuahua            | 73   | 0.6  | 35.6 | 0.252–0.469 |
| Pug                  | 63   | 0.5  | 63.5 | 0.513–0.746 |
| Rhodesian Lion       | 62   | 0.5  | 50.0 | 0.377–0.622 |
| Cão d'água Português | 56   | 0.4  | 44.6 | 0.320–0.576 |
| Schnauzer            | 54   | 0.4  | 53.7 | 0.404–0.665 |

|                             |        |       |      |             |
|-----------------------------|--------|-------|------|-------------|
| West Highland White Terrier | 53     | 0.4   | 30.1 | 0.189–0.432 |
| Dogo Argentino              | 51     | 0.4   | 70.5 | 0.572–0.818 |
| Rottweiler                  | 50     | 0.4   | 66.0 | 0.523–0.780 |
| Weimaraner                  | 46     | 0.4   | 45.6 | 0.317–0.599 |
| Great Dane                  | 43     | 0.3   | 53.5 | 0.387–0.678 |
| German Braco                | 43     | 0.3   | 41.8 | 0.279–0.567 |
| Spitz                       | 41     | 0.3   | 34.1 | 0.209–0.493 |
| Cane Corso                  | 41     | 0.3   | 36.5 | 0.229–0.518 |
| Portuguese pointer          | 39     | 0.3   | 46.1 | 0.311–0.616 |
| Belgian Shepherd            | 38     | 0.3   | 44.7 | 0.296–0.605 |
| Doberman                    | 37     | 0.3   | 48.6 | 0.330–0.644 |
| Bichon Maltese              | 36     | 0.3   | 41.6 | 0.265–0.579 |
| Dalmatian                   | 34     | 0.2   | 76.4 | 0.606–0.884 |
| Bichon                      | 34     | 0.2   | 23.5 | 0.115–0.393 |
| Fox Terrier                 | 30     | 0.2   | 36.5 | 0.210–0.544 |
| Others breeds (n < 30)      | 689    | 5.4   | 48.0 | 0.443–0.517 |
| Total                       | 12,805 | 100.0 | 46.1 | 0.453–0.470 |

**Table S5.** Description of tumours from **cats** according to breeds (N, %) and proportion of malignant tumours (MP % and respective 95% Confidence Interval). Total of 3246 records.

| Breeds                 | N    | %     | MP % | 95%CI       |
|------------------------|------|-------|------|-------------|
| Common European        | 2971 | 91.5  | 79.6 | 0.781–0.810 |
| Persian                | 103  | 3.2   | 60.2 | 0.505–0.693 |
| Siamese                | 83   | 2.6   | 73.5 | 0.633–0.821 |
| Norway Forest          | 42   | 1.3   | 71.4 | 0.568–0.835 |
| Others breeds (n < 30) | 47   | 1.5   | 65.9 | 0.523–0.795 |
| Total                  | 3246 | 100.0 | 78.6 | 0.772–0.800 |

**Table S6.** Description of tumours from **dogs** according to districts (N, %) and proportion of malignant tumours (MP % and respective 95% Confidence Interval). Total of 12,987 records.

| Districts        | N      | %     | MP % | 95%CI       |
|------------------|--------|-------|------|-------------|
| Lisboa           | 5933   | 45.6  | 45.9 | 0.445–0.472 |
| Setúbal          | 1765   | 13.6  | 41.8 | 0.394–0.441 |
| Porto            | 1162   | 9.0   | 45.7 | 0.427–0.486 |
| Faro             | 951    | 7.3   | 49.4 | 0.462–0.527 |
| Santarém         | 712    | 5.5   | 44.7 | 0.410–0.484 |
| Leiria           | 677    | 5.2   | 47.6 | 0.438–0.515 |
| Évora            | 402    | 3.1   | 56.0 | 0.507–0.611 |
| Aveiro           | 370    | 2.8   | 45.9 | 0.407–0.512 |
| Coimbra          | 341    | 2.6   | 48.9 | 0.435–0.543 |
| Braga            | 125    | 1.0   | 53.5 | 0.443–0.625 |
| Viana do Castelo | 95     | 0.7   | 48.3 | 0.379–0.587 |
| Beja             | 80     | 0.6   | 50.0 | 0.379–0.620 |
| Açores           | 79     | 0.6   | 45.4 | 0.337–0.574 |
| Viseu            | 71     | 0.6   | 41.4 | 0.303–0.531 |
| Portalegre       | 72     | 0.6   | 50.0 | 0.379–0.620 |
| Castelo Branco   | 67     | 0.5   | 48.2 | 0.379–0.587 |
| Guarda           | 46     | 0.4   | 48.8 | 0.343–0.635 |
| Madeira          | 39     | 0.3   | 28.2 | 0.157–0.434 |
| Total            | 12,987 | 100.0 | 46.2 | 0.443–0.460 |

**Table S7.** Description of tumours from **cats** according to districts (N, %) and proportion of malignant tumours (MP % and respective 95% Confidence Interval). Total of 3260 records.

| Districts        | N    | %     | MP % | 95%CI       |
|------------------|------|-------|------|-------------|
| Lisboa           | 1603 | 48.9  | 78.2 | 0.761–0.801 |
| Setúbal          | 474  | 14.5  | 74.5 | 0.705–0.783 |
| Porto            | 238  | 7.3   | 80.1 | 0.747–0.849 |
| Faro             | 213  | 6.5   | 81.6 | 0.759–0.865 |
| Santarém         | 182  | 5.6   | 82.7 | 0.768–0.878 |
| Leiria           | 150  | 4.6   | 80.6 | 0.737–0.865 |
| Coimbra          | 104  | 3.2   | 80.8 | 0.723–0.877 |
| Aveiro           | 79   | 2.4   | 70.5 | 0.598–0.798 |
| Évora            | 61   | 1.9   | 86.7 | 0.766–0.937 |
| Braga            | 37   | 1.1   | 88.9 | 0.760–0.964 |
| Castelo Branco   | 28   | 0.9   | 85.7 | 0.699–0.953 |
| Açores           | 22   | 0.7   | 95.2 | 0.806–0.997 |
| Viana do Castelo | 16   | 0.5   | 71.4 | 0.455–0.901 |
| Portalegre       | 14   | 0.4   | 85.7 | 0.620–0.974 |
| Beja             | 12   | 0.4   | 66.7 | 0.387–0.882 |
| Viseu            | 11   | 0.3   | 90.9 | 0.657–0.995 |
| Guarda           | 8    | 0.2   | 75.0 | 0.408–0.953 |
| Madeira          | 8    | 0.2   | 85.7 | 0.506–0.991 |
| Total            | 3260 | 100.0 | 78.7 | 0.773–0.801 |
